# Supplementary material for: Notch signaling during development requires the function of awd, the Drosophila homolog of human metastasis suppressor gene Nm23
Source: PubMed Central journal article supplement (PMC3937027; doi:10.1186/1741-7007-12-12), 2014-02-14
Supplement: 1741-7007-12-12-S2.pdf [file 1741-7007-12-12-S2.pdf]

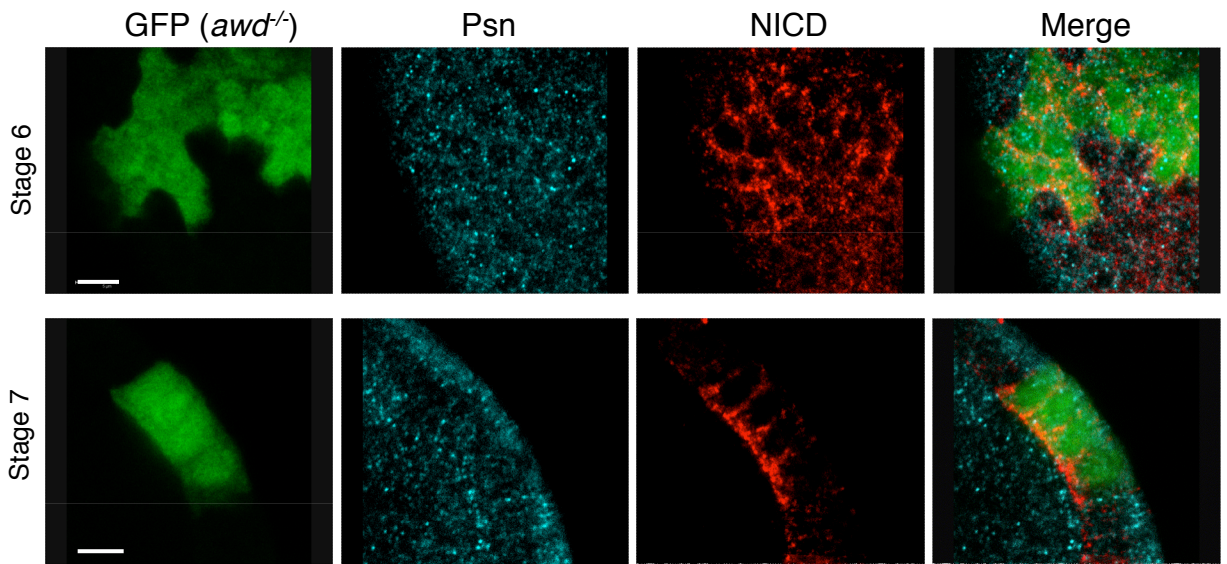

**Additional file 2 – Figure S2**
