# Supplementary material for: Notch signaling during development requires the function of awd, the Drosophila homolog of human metastasis suppressor gene Nm23
Source: PubMed Central journal article supplement (PMC3937027; doi:10.1186/1741-7007-12-12), 2014-02-14
Supplement: 1741-7007-12-12-S5.pdf [file 1741-7007-12-12-S5.pdf]

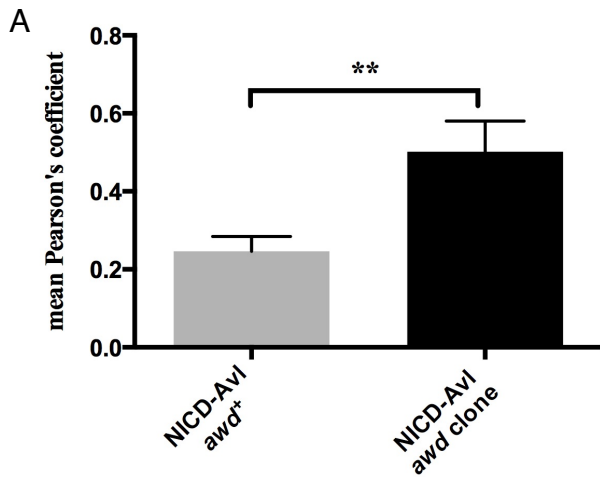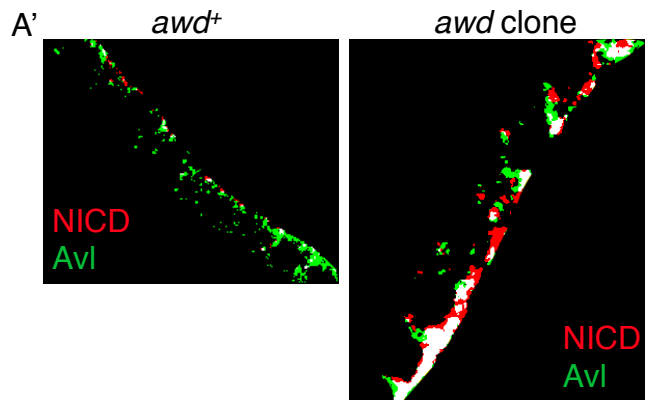

| Pearson's coefficient   |                  |
|-------------------------|------------------|
| <i>awd</i> <sup>+</sup> | <i>awd</i> clone |
| 0.246±0.038             | 0.502±0.068      |

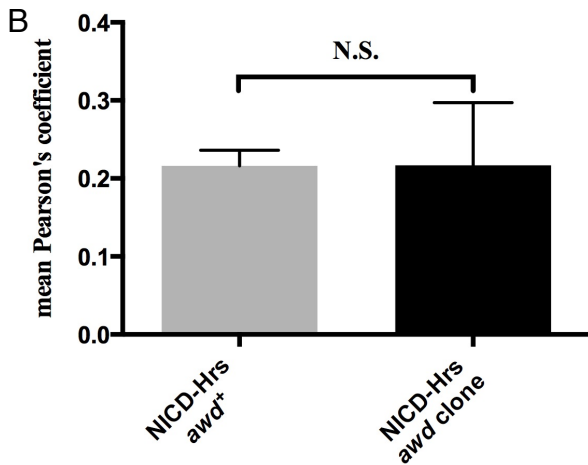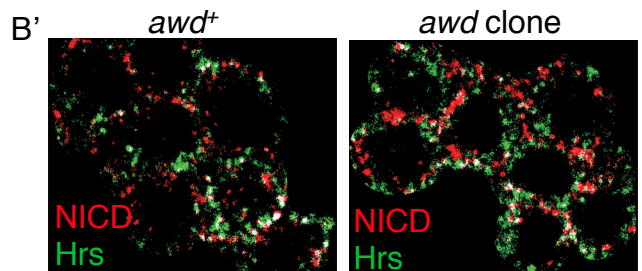

| Pearson's coefficient   |                  |
|-------------------------|------------------|
| <i>awd</i> <sup>+</sup> | <i>awd</i> clone |
| 0.216±0.017             | 0.217±0.070      |

**Additional file 5 – Figure S5**
