# Supplementary material for: Notch signaling during development requires the function of awd, the Drosophila homolog of human metastasis suppressor gene Nm23
Source: PubMed Central journal article supplement (PMC3937027; doi:10.1186/1741-7007-12-12), 2014-02-14
Supplement: 1741-7007-12-12-S10.pdf [file 1741-7007-12-12-S10.pdf]

## Supplementary experimental procedures

### Genotypes of dissected females

- 1) *en2.4-GAL4<sup>e22c</sup>, UAS-flp/+; FRT<sup>82B</sup>/FRT<sup>82B</sup>, awd<sup>j2A4</sup>*
- 2) *en2.4-GAL4<sup>e22c</sup>, UAS-flp/+; Ubi-GFP, FRT<sup>82B</sup>/FRT<sup>82B</sup>, awd<sup>j2A4</sup>*
- 3) *en2.4-GAL4<sup>e22c</sup>, UAS-flp/UAS-YFP-Rab5<sup>wl</sup>; FRT<sup>82B</sup>/FRT<sup>82B</sup>, awd<sup>j2A4</sup>*
- 4) *en2.4-GAL4<sup>e22c</sup>, UAS-flp/UAS-YFP-Rab5<sup>CA</sup>; FRT<sup>82B</sup>/FRT<sup>82B</sup>, awd<sup>j2A4</sup>*
- 5) *hs-flp; +/+; Ubi-GFP, FRT<sup>82B</sup>/FRT<sup>82B</sup>, awd<sup>j2A4</sup>*
- 6) *y, w, hs-flp/GbeSu(H)<sub>m8</sub>-lacZ; UAS-YFP-Rab5<sup>wl</sup>/+; Tub-Gal4, FRT<sup>82B</sup>, Tub-Gal80/FRT<sup>82B</sup>, awd<sup>j2A4</sup>*
- 7) *y, w, hs-flp/GbeSu(H)<sub>m8</sub>-lacZ; UAS-YFP-Rab5<sup>CA</sup>/+; Tub-Gal4, FRT<sup>82B</sup>, Tub-Gal80/FRT<sup>82B</sup>, awd<sup>j2A4</sup>*
- 8) *y, w, hs-flp/GbeSu(H)<sub>m8</sub>-lacZ; UAS-YFP-Rab5<sup>DN</sup>/+; Tub-Gal4, FRT<sup>82B</sup>, Tub-Gal80/FRT<sup>82B</sup>, awd<sup>j2A4</sup>*
- 9) *y, w, hs-flp/GbeSu(H)<sub>m8</sub>-lacZ; Act-Gal4, UAS-GFP/UAS-NICD; FRT<sup>82B</sup>, Act-Gal80/FRT<sup>82B</sup>, awd<sup>j2A4</sup>*
- 10) *hs-flp/GbeSu(H)<sub>m8</sub>-lacZ; Act-Gal4, UAS-GFP/UAS-NEXT; FRT<sup>82B</sup>, Act-Gal80/FRT<sup>82B</sup>, awd<sup>j2A4</sup>*
- 11) *shi<sup>2</sup>/shi<sup>2</sup>*

The crosses to obtain females of the genotype from 1) to 4) were performed at 18°C. Newly born females were transferred to fresh vials with *w<sup>67c23</sup>* males and incubated at 29°C.

Before dissection, the flies were transferred to fresh, yeasted food daily at 29°C for 5 days.

The crosses to obtain females of the genotype from 5) to 10) were performed at 25°C. 1-2 days-old females were heat shocked three times for 1 hr at 37°C and then transferred to fresh vials with *w<sup>67c23</sup>* males and incubated at 25°C. Before dissection, the flies were transferred to fresh, yeasted food daily at 25°C for 4 days.

1-2 days-old *shi<sup>2</sup>/shi<sup>2</sup>* females were transferred at 29°C for 6 hr and then dissected and processed for immunostaining

### **Genotypes of dissected larvae**

1) *y, w, hs-flp; +/+; FRT<sup>82B</sup>, Ubi-GFP/FRT<sup>82B</sup>, awd<sup>j2A4</sup>*

2) *y, w, hs-flp/GbeSu(H)<sub>ms</sub>-lacZ; Act-Gal4, UAS-GFP/+; FRT<sup>82B</sup>, Act-Gal80/FRT<sup>82B</sup>, awd<sup>j2A4</sup>*

Loss of function clones of *awd<sup>j2A4</sup>* were induced at 48h after egg laying by 1 hr heat shock at 37°C.

### **Genotypes of flies for cuticle preparation of adult wings**

1) *en2.4-GAL4<sup>e22c</sup>, UAS-flp/+; FRT<sup>82B</sup>/FRT<sup>82B</sup>, awd<sup>j2A4</sup>*
